# Supplementary material
Source: publisher site journal article supplement (https://www.spandidos-publications.com/4254/downloadSupplementary)
Supplement: Supplementary file 1 [file downloadSupplementary]

## Sheet: Sheet1
Table SII. Differentially expressed miRNAs in patients and healthy participants.
AccID	P1(TPM)	P2(TPM)	P3(TPM)	N1(TPM)	N2(TPM)	N3(TPM)
hsa-miR-335-5p	110.512	91.1737	3433.29	170.901	163.93	73.9785
hsa-miR-574-3p	590.82	421.373	1599.83	547.252	397.417	177.432
hsa-miR-22-3p	263.144	295.6	185.483	809.585	596.898	317.912
hsa-miR-24-3p	296.274	289.366	255.08	990.524	404.63	414.178
hsa-miR-574-5p	254.501	194.868	1034.46	291.026	203.431	135.833
hsa-miR-96-5p	236.524	173.204	114.44	527.594	461.563	226.001
hsa-miR-4634	8.46992	10.9097	24.2704	8.19791	186.429	158.194
hsa-miR-20a-5p	182.593	192.53	151.891	342.304	490.674	345.645
hsa-miR-668-3p	94.7824	52.4703	39.4594	99.9643	152.509	337.876
hsa-miR-3135b	151.767	129.877	45.1654	230.963	264.83	304.263
hsa-miR-3074-5p	152.919	140.059	126.736	503.92	200.426	216.345
hsa-miR-34a-5p	137.823	56.4706	206.459	291.862	356.799	171.116
hsa-miR-100-5p	59.4046	65.9256	9.96532	84.9905	154.398	158.847
hsa-miR-1303	181.268	131.799	69.3554	64.4958	47.8308	19.3114
hsa-miR-10a-5p	108.15	413.425	84.6248	144.718	92.055	44.2855
hsa-miR-320a-5p	8.4123	8.20823	10.6886	19.3236	107.598	40.5829
hsa-miR-132-3p	60.9027	66.7568	28.1279	153.585	153.368	69.8404
hsa-miR-146a-5p	40.2753	193.517	20.9754	82.1464	4.12187	3.84776
hsa-miR-5588-5p	213.937	131.02	73.6147	92.9375	85.1852	20.3278
hsa-miR-1307-5p	33.822	46.9116	50.8713	86.6636	128.121	83.9246
hsa-miR-2277-3p	27.2535	58.8083	14.5461	49.3547	159.379	42.7609
hsa-miR-8485	10.1409	5.9224	96.6796	10.0383	7.47088	3.92035
hsa-miR-6131	17.7465	15.1696	2.3306	29.9475	75.9969	30.8546
hsa-miR-12136	2.70807	5.61069	2.57169	55.6286	21.8115	3.41216
hsa-miR-15a-5p	55.6018	42.3919	64.6942	147.981	109.058	67.5898
hsa-miR-148a-5p	52.548	65.6139	20.7343	74.7013	145.124	62.7983
hsa-let-7d-3p	71.735	44.4699	134.532	45.3394	46.4569	21.6345
hsa-miR-223-3p	5.58899	1.71438	9.00093	73.6138	0.343489	0.435595
hsa-miR-9901	0.864277	0.727312	1.84841	0.669217	30.5705	11.8337
hsa-let-7b-3p	42.4648	51.4313	113.155	41.4078	38.7284	21.562
hsa-miR-1275	25.8131	21.144	31.1818	5.85565	8.84484	7.18732
hsa-miR-664a-3p	67.0679	45.3011	56.738	35.9704	31.2575	15.1006
hsa-miR-8077	0.691422	1.09097	4.33973	6.35756	7.38501	22.9413
hsa-miR-185-3p	4.32139	3.48071	4.58083	11.7949	25.1606	11.9063
hsa-miR-3960	10.8323	9.24725	14.2247	16.3122	38.7284	29.1849
hsa-miR-181a-5p	17.3432	12.5721	8.11691	32.1224	20.7811	35.4284
hsa-miR-6771-3p	1.78617	1.76633	3.37535	8.78347	17.7755	6.89692
hsa-miR-6126	0.979514	1.09097	0.482193	3.59704	16.0581	2.97657
hsa-miR-1538	2.53521	5.9224	2.65206	4.34991	23.7007	12.1967
hsa-miR-3916	9.21896	7.32507	47.1745	7.36138	11.5069	5.66273
hsa-miR-142-3p	6.10756	1.29877	0.964385	29.1946	3.00553	2.32317
hsa-miR-1270	1.32522	6.75361	22.1005	1.924	3.00553	1.52458
hsa-miR-1181	5.07043	1.81828	11.4119	6.19026	27.6508	16.843
hsa-miR-6872-3p	2.36236	1.81828	8.19728	8.86712	18.7201	12.8501
hsa-miR-1285-5p	21.2612	61.4578	4.25937	20.5784	15.0276	6.96952
hsa-let-7c-3p	7.4904	19.7933	47.0942	7.61234	17.6897	9.65569
hsa-miR-26a-1-3p	7.95135	6.80556	29.253	5.27008	6.44042	4.13815
hsa-miR-6820-3p	0.979514	1.35072	0	11.9622	3.95012	1.16159
hsa-miR-7108-5p	0.403329	0.727312	1.52694	0.920173	9.61769	7.18732
hsa-miR-1269a	0.0576185	0.831213	11.9745	0.167304	0.343489	0.217797
hsa-miR-4418	7.95135	3.53266	0	0.0836521	0.171744	0
hsa-miR-204-5p	17.977	24.0013	3.13425	6.77582	6.95565	3.77516
hsa-miR-10400-5p	4.83995	3.3768	1.60731	18.2362	8.50135	4.57375
hsa-miR-1273c	27.0807	17.975	12.6174	7.69599	14.083	5.08194
hsa-miR-451a	5.47375	5.14313	0.321462	0	0	0
hsa-miR-4750-3p	2.13188	2.23389	2.57169	7.69599	12.9667	4.28335
hsa-miR-10a-3p	4.83995	17.975	8.75983	5.85565	2.66204	1.96018
hsa-miR-181b-5p	3.68758	3.2729	1.20548	8.61617	5.15233	10.0187
hsa-miR-132-5p	2.41998	3.48071	0.401827	6.94312	9.70356	3.84776
hsa-miR-320d	19.0717	15.7931	6.99179	7.61234	8.41548	3.70256
hsa-miR-519c-3p	3.86044	3.169	0.0803654	0.167304	0	0
hsa-miR-374c-5p	6.22279	6.54581	27.4046	8.44886	7.55675	3.77516
hsa-miR-4510	5.58899	19.4816	9.64385	3.848	7.7285	4.50115
P, patients; N, healthy participants; TPM, transcript per million.
